# Supplementary material for: Phylogenetic Analysis, Lineage-Specific Expansion and Functional Divergence of seed dormancy 4-Like Genes in Plants
Source: PubMed Central journal article supplement (PMC4907471; doi:10.1371/journal.pone.0153717), 2016-06-14

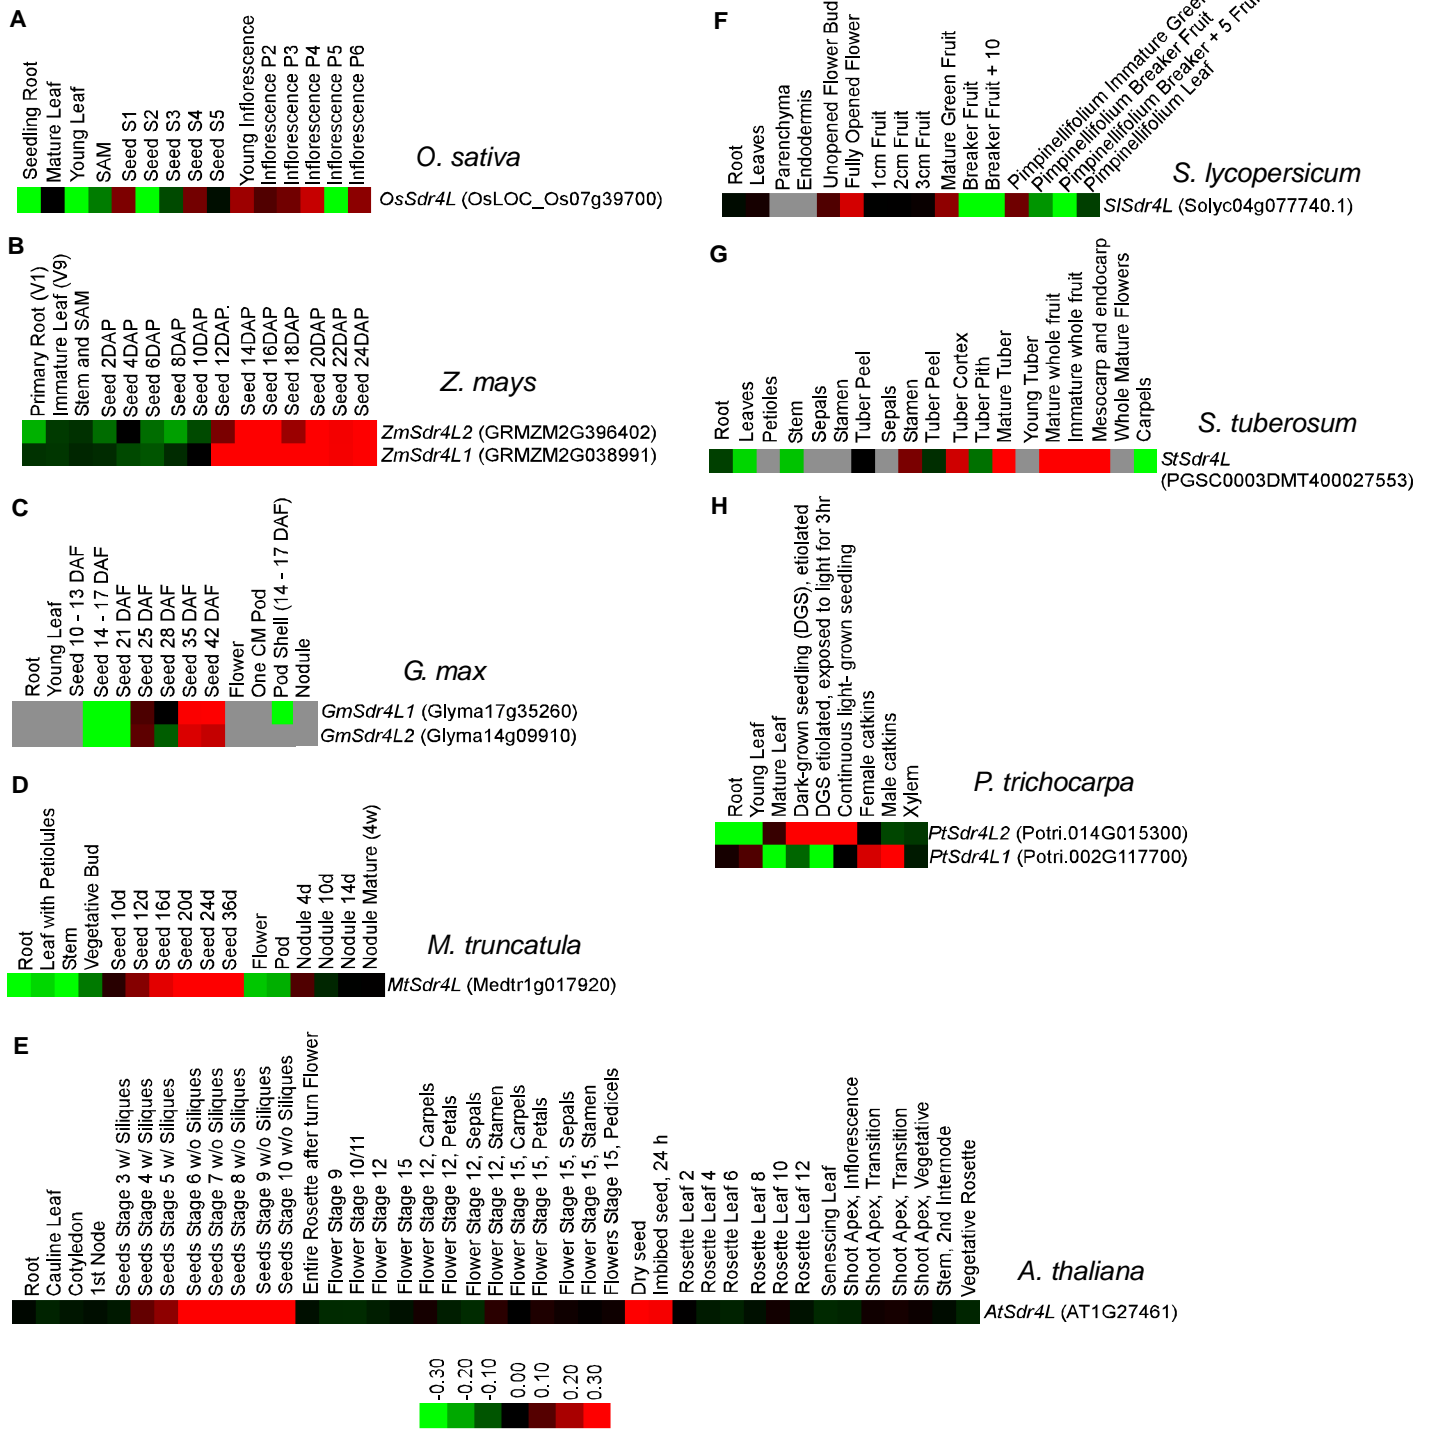

Supplement: pone.0153717.s004.pdf [file pone.0153717.s004.pdf]
