# Supplementary material for: Phylogenetic Analysis, Lineage-Specific Expansion and Functional Divergence of seed dormancy 4-Like Genes in Plants
Source: PubMed Central journal article supplement (PMC4907471; doi:10.1371/journal.pone.0153717), 2016-06-14
Supplement: pone.0153717.s007.pdf [file pone.0153717.s007.pdf]

[\[Home\]](#) [\[Server\]](#) [\[Queue\]](#) [\[About\]](#) [\[Remove\]](#) [\[Statistics\]](#)

## I-TASSER results for job id S205397

[Click on [S205397\\_results.tar.bz2](#) to download the tarball file including all modeling results listed on this page]

Submitted Sequence in [FASTA format](#)

### >Rice OsSdr4L protein

```
MAMVQPVDMAVKANEIMARFRPIAPKPVLPA AAAAGVTGGGDGAAVAATNRVLCQLQSRP
CRARKRGRPSVPPVSPAGAKRKRAPAYPVPVAPLRCAAVATATRARVSVVVVPAPESA
GGVSALAPVSPSAGDSTRLSPTVVEVEDEDEERGVLVERDLLRKLLEPRKLEPRAVRP
VGSTIHVESVHIDVGRTTAAAAAAPKTAEVEAELESDSLPAVVS DSSNRVRLVNDAYK
RMVGQPECPWLD AVATAASRRISGEVALVSE PAAAAAALPETCKGFSCSAKIAWERDGK
WSSVHAPCDVTRLQCESRDYVFAWRFRAAGDECNTHRRAAGDA
```

### Predicted Secondary Structure

|                    |                                                                                                                                                          |                               |                                 |                             |                                |          |          |
|--------------------|----------------------------------------------------------------------------------------------------------------------------------------------------------|-------------------------------|---------------------------------|-----------------------------|--------------------------------|----------|----------|
|                    | 20                                                                                                                                                       | 40                            | 60                              | 80                          | 100                            | 120      | 140      |
|                    |                                                                                                                                                          |                               |                                 |                             |                                |          |          |
| <b>Sequence</b>    | MAMVQPVDMAVKANEIMARFRPIAPKPVLPA                                                                                                                          | AAAAGVTGGGDGAAVAATNRVLCQLQSRP | CRARKRGRPSVPPVSPAGAKRKRAPAYPVPV | APLRCAAVATATRARVSVVVVPAPESA | GGVSALAPVSPSAGDSTRLSPTVVEVEDEE | ER       |          |
| <b>Prediction</b>  | CCCCCCCC                                                                                                                                                 | HHHHHHHH                      | CCCCCCCC                        | CCCCCCCC                    | CCCCCCCC                       | CCCCCCCC | CCCCCCCC |
| <b>Conf. Score</b> | 96146676348899999852788899989988777667665544553000002101366665565777778767787654445444577687864343223665564233457776655644546688875665444556655675445675 |                               |                                 |                             |                                |          |          |

H:Helix; S:Strand; C:Coil

### Predicted Solvent Accessibility

|                   |                                                                                                                                                            |                               |                                 |                             |                                |     |     |
|-------------------|------------------------------------------------------------------------------------------------------------------------------------------------------------|-------------------------------|---------------------------------|-----------------------------|--------------------------------|-----|-----|
|                   | 20                                                                                                                                                         | 40                            | 60                              | 80                          | 100                            | 120 | 140 |
|                   |                                                                                                                                                            |                               |                                 |                             |                                |     |     |
| <b>Sequence</b>   | MAMVQPVDMAVKANEIMARFRPIAPKPVLPA                                                                                                                            | AAAAGVTGGGDGAAVAATNRVLCQLQSRP | CRARKRGRPSVPPVSPAGAKRKRAPAYPVPV | APLRCAAVATATRARVSVVVVPAPESA | GGVSALAPVSPSAGDSTRLSPTVVEVEDEE | ER  |     |
| <b>Prediction</b> | 6431422734230230034021102214334334444444554444333332443433334334444453444444656444444534636344344443442335324345243463553444234113144642642443344145345644 |                               |                                 |                             |                                |     |     |

Values range from 0 (buried residue) to 9 (highly exposed residue)

### Predicted normalized B-factor

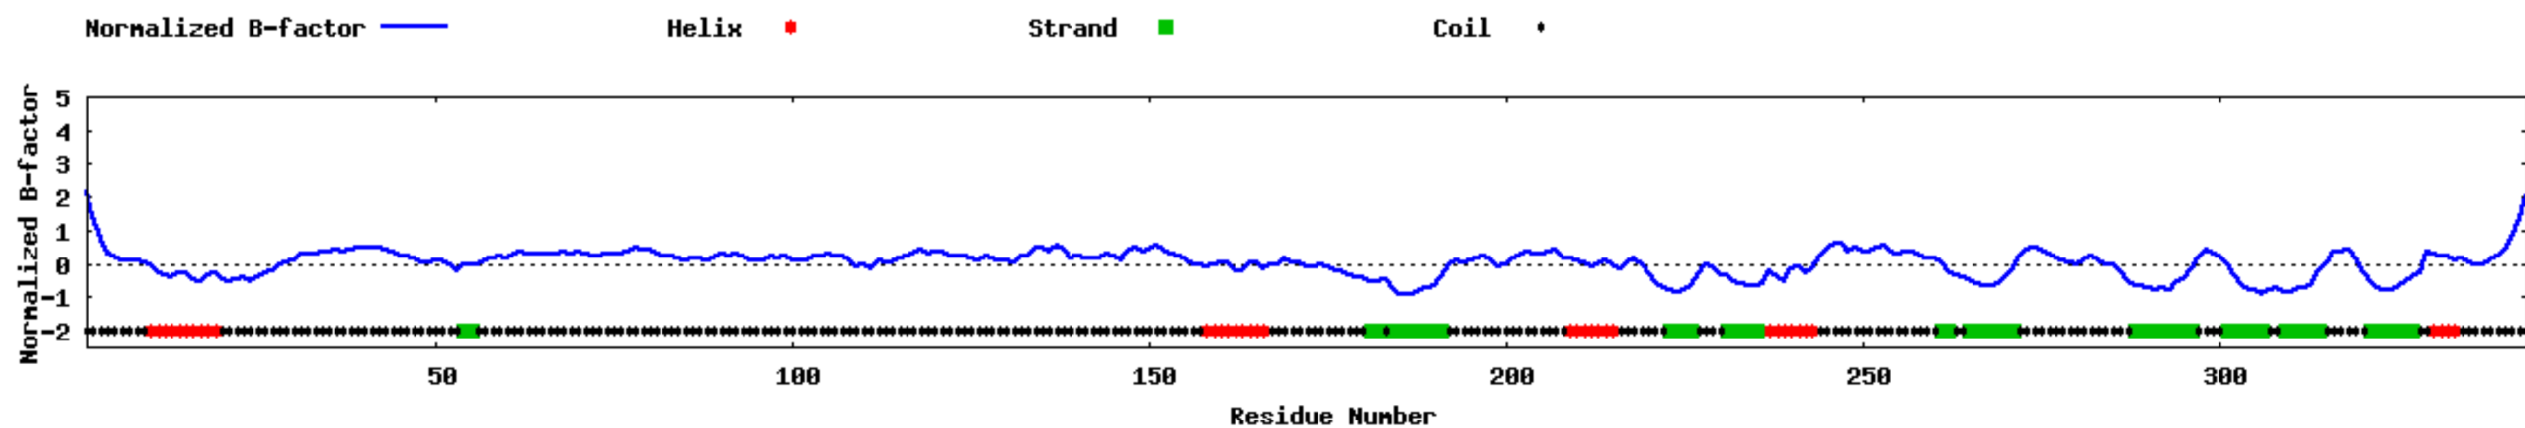

[Read more about predicted normalized B-factor](#)

## Top 10 templates used by I-TASSER

| Rank | PDB Hit               | Iden1 | Iden2 | Cov. | Norm. Z-score | Download Align.          | 20                                | 40                                | 60                                       | 80                           | 100               | 120                 |                    |                 |              |                      |
|------|-----------------------|-------|-------|------|---------------|--------------------------|-----------------------------------|-----------------------------------|------------------------------------------|------------------------------|-------------------|---------------------|--------------------|-----------------|--------------|----------------------|
|      |                       |       |       |      |               |                          | CCCCCCCC                          | HHHHHHHH                          | CCCCCCCC                                 | CCCCCCCC                     | CCCCCCCC          | CCCCCCCC            |                    |                 |              |                      |
|      |                       |       |       |      |               |                          | Sec.Str                           |                                   |                                          |                              |                   |                     |                    |                 |              |                      |
|      |                       |       |       |      |               |                          | Seq                               |                                   |                                          |                              |                   |                     |                    |                 |              |                      |
| 1    | <a href="#">4bmlA</a> | 0.06  | 0.22  | 0.87 | 1.62          | <a href="#">Download</a> | --ALKLFSGEV-----                  | FTAFNNASIFKGLVRSYDLRGGKSKQFMF     | TGKLSAGYHTPGTPIVGDAGIKANEKTLVMDLLVSSQFVY | SLDEIFSQYSTRAEVSKQIGALATHYD  | ERIA              | RVLAKASAF           |                    |                 |              |                      |
| 2    | <a href="#">1maeH</a> | 0.07  | 0.21  | 0.98 | 1.62          | <a href="#">Download</a> | ----SSASAAAAA                     | AALAAGAADGPTNDEAPGADGRRSYINLPAHHS | AIQQWVLDAGSGSILGHVNGGFLPNPVA             | AHSGSEFALASTSFSRIAKGKRTDYVEV | FDPVTF            | FLPIADIEL           | LPDAPRFDVGPY       |                 |              |                      |
| 3    | <a href="#">1dgiR</a> | 0.09  | 0.16  | 0.87 | 1.55          | <a href="#">Download</a> | VVVQAPTQVPGFLDSVTLPCYLQVPNMEVTHVS | QLTWARHGESGSMVAFHQ                | TQGPSYSESKRLEFVAARLGAE                   | LRNASLR-----                 | MFGLRVEDEGNYTCLFV | TFPQGSRS            | VDIWLRVLAKPQNTAEVQ |                 |              |                      |
| 4    | <a href="#">1w0rA</a> | 0.08  | 0.19  | 0.96 | 1.45          | <a href="#">Download</a> | SVEDCCLNTAFAYQKRS                 | GGLCQPCRSRWSLVGWNGQCSGK           | VAPGTLEWQLQACED                          | QQCCPEMGGWSGWGPWPC           | SVTCSK            | TRTRRRACNHPAPKCGGHC | PGQAQ              | ESEACDTQQVCP    | THGAWATWGPWI |                      |
| 5    | <a href="#">2ocwA</a> | 0.07  | 0.22  | 1.00 | 1.50          | <a href="#">Download</a> | SRGLSFDVSL                        | EVSQGPGLLNDTKVYTVDLGRTVT          | INCPFKTENAQKQIGLYPVLVID                  | SSGYVNPNYTGRI                | RLDIQGTGGDDSN     | SNKKNADLQVLK        | PEPELVYEDLR        | GSVTFHCALGP     | EVANVAKFLCRQ |                      |
| 6    | <a href="#">1mv3A</a> | 0.09  | 0.17  | 0.59 | 1.45          | <a href="#">Download</a> | DGSPAAT-----                      | PEIRVNHEPEPAGGATPGATLPKSP         | SQLRKGPVPPPKHTPSKEVKQE                   | QILSLFEDTFVPEISVTT           | PSQPAEASEVAGGTQPA | AAGAE               | EPGETAASEA         | AASSSLPAVVVE    |              |                      |
| 7    | <a href="#">3j65R</a> | 0.08  | 0.17  | 0.81 | 1.45          | <a href="#">Download</a> | -----                             | -----                             | -----                                    | -----                        | SSTQDS            | KAQTLNSNPEILLR      | KRRNADRT           | RIERQELAKKKREEQ | IKKKRSNKNK   | FVRAESIVAKTLATSREKE  |
| 8    | <a href="#">3b7fA</a> | 0.09  | 0.20  | 0.95 | 1.44          | <a href="#">Download</a> | SAPESGPVLLV                       | ATIKGAWFLALRGPVFLGHTIHHI          | VQDPREPERLAARTLGPTVFR                    | SDDGGGNWTEATRPPAFNKA         | PGRVVDHVF         | WLTPGHASEPGT        | WYAGTDHGASWEP      | VAGFNDHPRRAW    | TGGEPDGI     |                      |
| 9    | <a href="#">3cm9S</a> | 0.09  | 0.22  | 1.00 | 1.37          | <a href="#">Download</a> | -INSRGLSFDV                       | SLEVSQGPGLLNDTKVYTVDLGRTVT        | INCPFKTENAQKRKSLYKQ                      | IGLYPVLVIDSSGYVNP            | NYTQAGDDSN        | SNKKNADLQVLK        | PEPELVYEDLR        | GSVTFHCALGP     | EVANVAKFLCRQ |                      |
| 10   | <a href="#">1tziA</a> | 0.09  | 0.21  | 1.00 | 1.42          | <a href="#">Download</a> | DIKYSGP                           | IGCTYARELVGAGYKVA                 | FDIGEIDSGLKIGAHKKN                       | TVEYQKNIDKFNVIQ              | QGQLSVSVPVNTLV    | VDTLSPT             | TSWQASTFFV         | RNGSNPEQDPLR    | NLSGQAVTRV   | VGGSTHWCATPRFDREQRPI |

(a) All the residues are colored in black; however, those residues in template which are identical to the residue in the query sequence are highlighted in color. Coloring scheme is based on the property of amino acids, where polar are brightly coloured while non-polar residues are colored in dark shade. [more about the colors used](#)

(b) Rank of templates represents the top ten threading templates used by I-TASSER.

(c) Iden1 is the percentage sequence identity of the templates in the threading aligned region with the query sequence.

(d) Iden2 is the percentage sequence identity of the whole template chains with query sequence.

(e) Cov. represents the coverage of the threading alignment and is equal to the number of aligned residues divided by the length of query protein.

(f) Norm. Z-score is the normalized Z-score of the threading alignments. Alignment with a Normalized Z-score >1 mean a good alignment and vice versa.

(g) Download Align. provides the 3D structure of the aligned regions of the threading templates.

(h) The top 10 alignments reported above (in order of their ranking) are from the following threading programs:

1: Neff-PPAS 2: PROSPECT2 3: Neff-PPAS 4: PROSPECT2 5: Neff-PPAS 6: PROSPECT2 7: Neff-PPAS 8: PROSPECT2 9: Neff-PPAS 10: PROSPECT2

## Top 5 Models predicted by I-TASSER

[Generated 3D models](#)

[Estimated local accuracy of models](#)

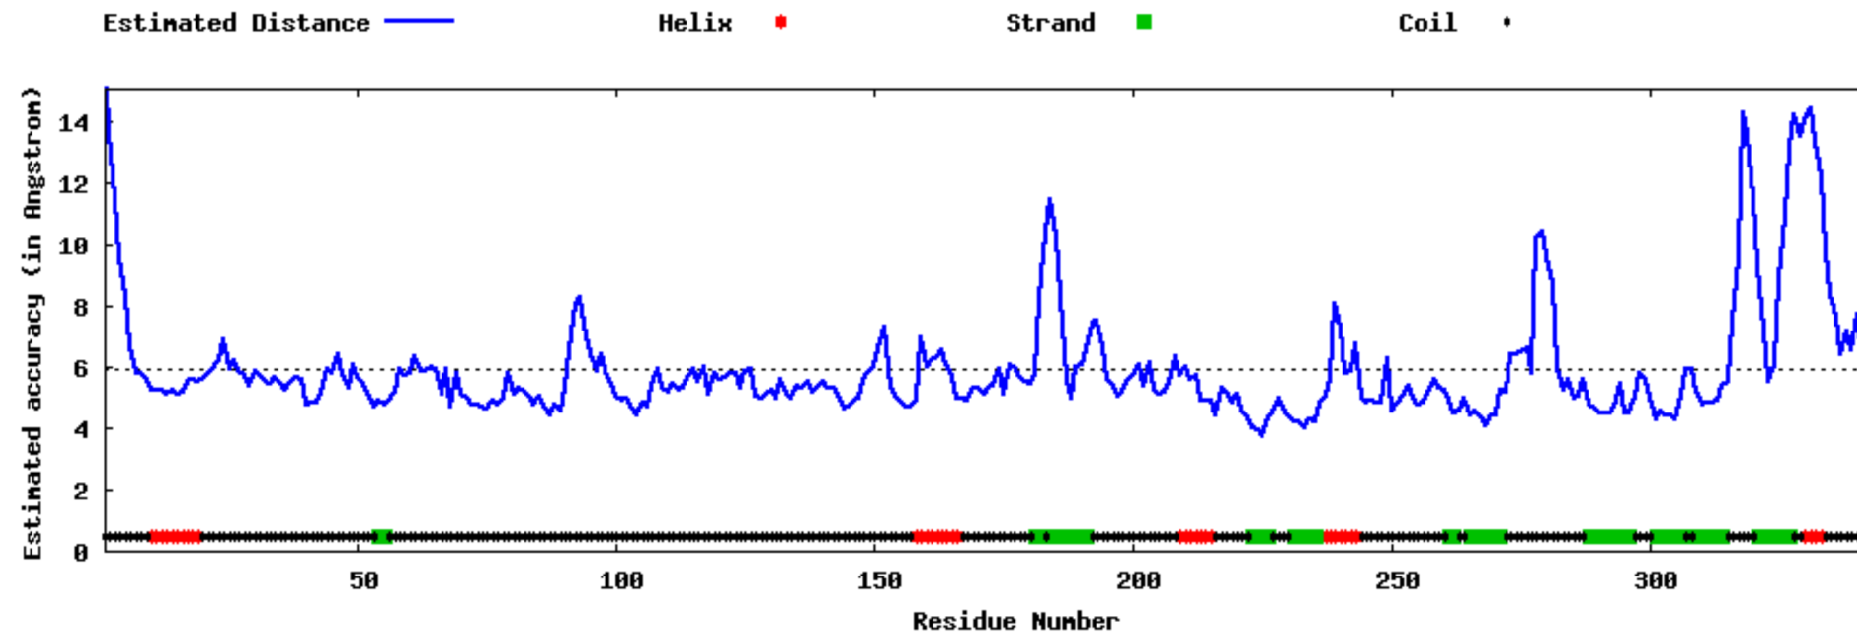

- [Download Model 1](#)
- C-score=-2.67 ([Read more about C-score](#))
- Estimated TM-score =  $0.41 \pm 0.14$
- Estimated RMSD =  $12.9 \pm 4.2 \text{ \AA}$

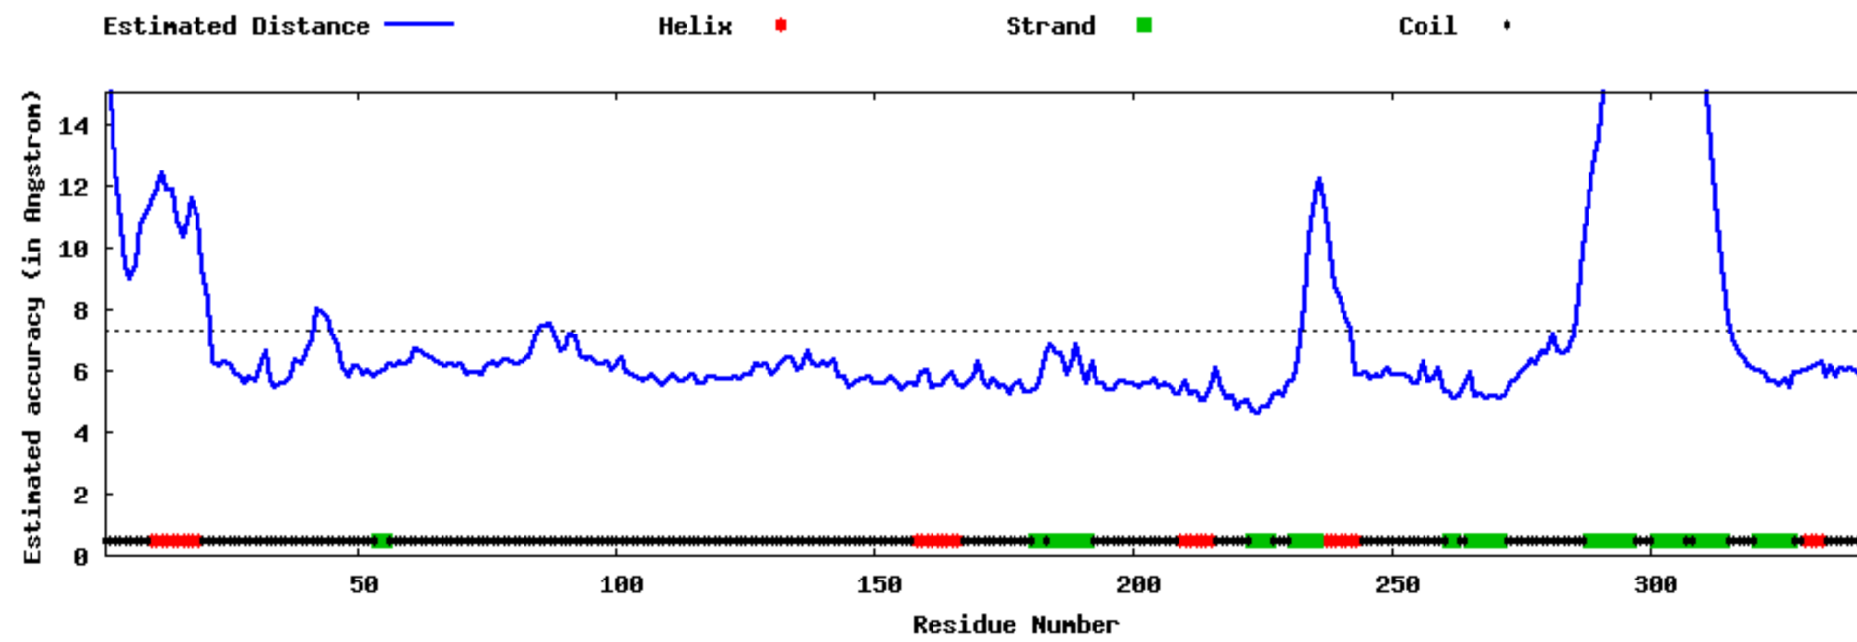

- [Download Model 2](#)
- C-score = -3.83

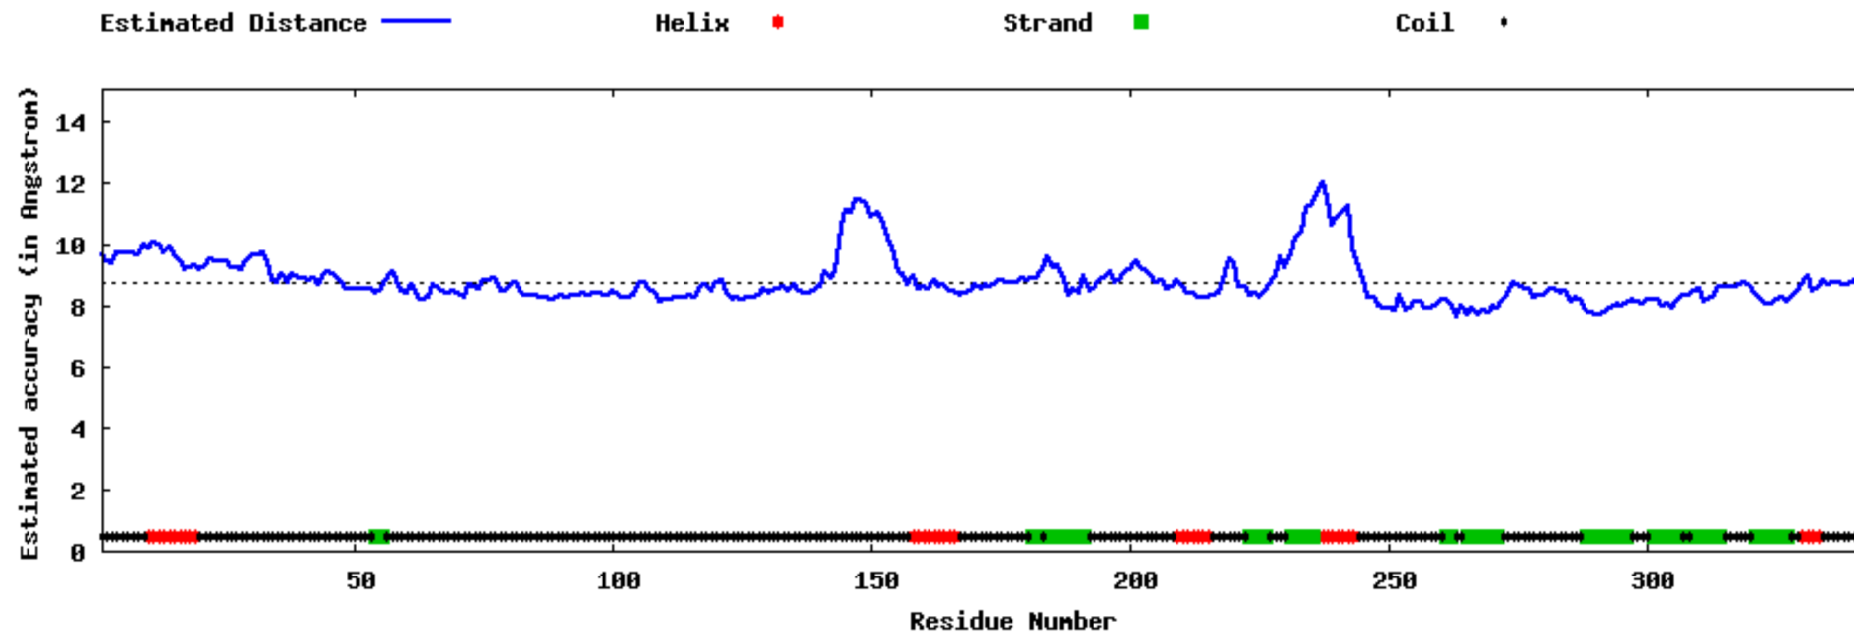

- [Download Model 3](#)
- C-score = -2.39

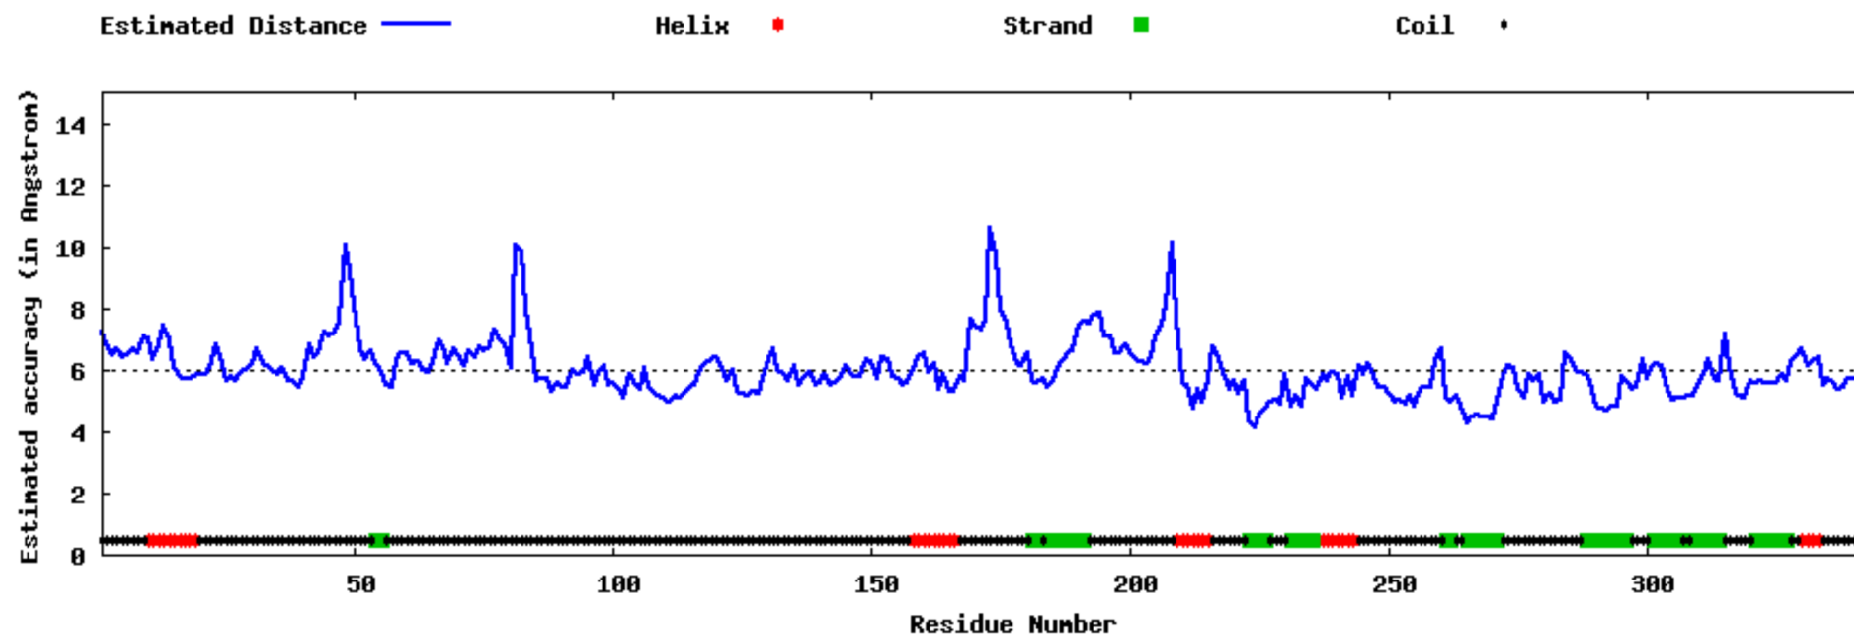

- [Download Model 4](#)
- C-score = -2.75

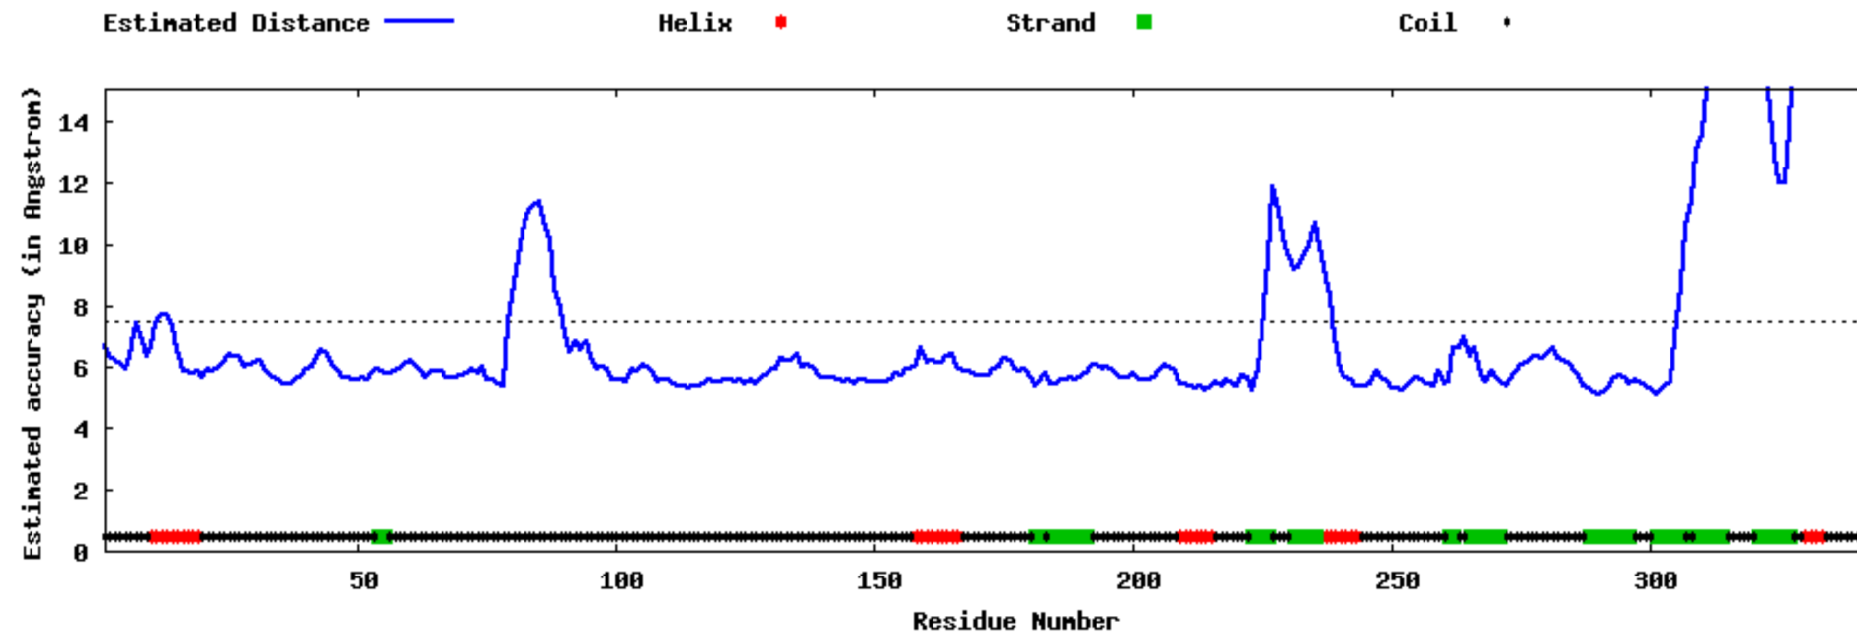

- [Download Model 5](#)
- C-score = -4.26

Proteins structurally close to the target in the PDB (as identified by [TM-align](#))

#### Top 10 Identified structural analogs in PDB

| Click to view                    | Rank | PDB Hit               | TM-score | RMSD <sup>a</sup> | IDEN <sup>a</sup> | Cov.  | Download Alignment       |
|----------------------------------|------|-----------------------|----------|-------------------|-------------------|-------|--------------------------|
| <input checked="" type="radio"/> | 1    | <a href="#">2gc4E</a> | 0.947    | 1.73              | 0.073             | 0.994 | <a href="#">Download</a> |
| <input type="radio"/>            | 2    | <a href="#">1maeH</a> | 0.940    | 1.64              | 0.071             | 0.983 | <a href="#">Download</a> |
| <input type="radio"/>            | 3    | <a href="#">3c75J</a> | 0.937    | 1.74              | 0.062             | 0.985 | <a href="#">Download</a> |
| <input type="radio"/>            | 4    | <a href="#">1mdaH</a> | 0.929    | 1.69              | 0.054             | 0.974 | <a href="#">Download</a> |
| <input type="radio"/>            | 5    | <a href="#">1madH</a> | 0.928    | 1.70              | 0.072             | 0.974 | <a href="#">Download</a> |
| <input type="radio"/>            | 6    | <a href="#">2hkmB</a> | 0.815    | 2.62              | 0.064             | 0.915 | <a href="#">Download</a> |
| <input type="radio"/>            | 7    | <a href="#">1jjuB</a> | 0.661    | 3.23              | 0.086             | 0.781 | <a href="#">Download</a> |
| <input type="radio"/>            | 8    | <a href="#">1qniF</a> | 0.659    | 3.70              | 0.072             | 0.813 | <a href="#">Download</a> |
| <input type="radio"/>            | 9    | <a href="#">1jmzB</a> | 0.658    | 3.64              | 0.076             | 0.808 | <a href="#">Download</a> |
| <input type="radio"/>            | 10   | <a href="#">2eceA</a> | 0.656    | 3.91              | 0.050             | 0.825 | <a href="#">Download</a> |

(a) Query structure is shown in cartoon, while the structural analog is displayed using backbone trace.

(b) Ranking of proteins is based on TM-score of the structural alignment between the query structure and known structures in the PDB library.

(c) RMSD<sup>a</sup> is the RMSD between residues that are structurally aligned by TM-align.

(d) IDEN<sup>a</sup> is the percentage sequence identity in the structurally aligned region.

(e) Cov. represents the coverage of the alignment by TM-align and is equal to the number of structurally aligned residues divided by length of the query protein.

Spin On/Off

Function Prediction using [COFACTOR](#)

## Predicted EC Numbers

## Top 5 enzyme homologs in PDB

| Click to view         | Rank | Cscore <sup>EC</sup> | PDB Hit               | TM-score | RMSD <sup>a</sup> | IDEN <sup>a</sup> | Cov.  | EC Number                | Predicted Active Site Residues |
|-----------------------|------|----------------------|-----------------------|----------|-------------------|-------------------|-------|--------------------------|--------------------------------|
| <input type="radio"/> | 1    | 0.195                | <a href="#">2gc7A</a> | 0.947    | 1.74              | 0.073             | 0.994 | <a href="#">1.4.99.3</a> | NA                             |
| <input type="radio"/> | 2    | 0.192                | <a href="#">1madH</a> | 0.928    | 1.70              | 0.072             | 0.974 | <a href="#">1.4.99.3</a> | NA                             |
| <input type="radio"/> | 3    | 0.192                | <a href="#">2madH</a> | 0.939    | 1.65              | 0.071             | 0.983 | <a href="#">1.4.99.3</a> | NA                             |
| <input type="radio"/> | 4    | 0.189                | <a href="#">3c75J</a> | 0.937    | 1.74              | 0.062             | 0.985 | <a href="#">1.4.99.3</a> | NA                             |
| <input type="radio"/> | 5    | 0.167                | <a href="#">2h47H</a> | 0.815    | 2.69              | 0.063             | 0.918 | <a href="#">1.4.99.4</a> | NA                             |

Click on the radio buttons to visualize predicted active site residues.

(a) Cscore<sup>EC</sup> is the confidence score for the Enzyme Classification (EC) number prediction. Cscore<sup>EC</sup> values range in between [0-1]; where a higher score indicates a more reliable EC number prediction.

(b) TM-score is a measure of global structural similarity between query and template protein.

(c) RMSD<sup>a</sup> is the RMSD between residues that are structurally aligned by TM-align.

(d) IDEN<sup>a</sup> is the percentage sequence identity in the structurally aligned region.

(e) Cov. represents the coverage of global structural alignment and is equal to the number of structurally aligned residues divided by length of the query protein.

Spin On/Off

## Predicted GO terms

| Rank | Cscore <sup>GO</sup> | TMscore | RMSD <sup>a</sup> | IDEN <sup>a</sup> | Cov. | PDB Hit               | Associated GO Terms                                                                                                                                                                                                                                |
|------|----------------------|---------|-------------------|-------------------|------|-----------------------|----------------------------------------------------------------------------------------------------------------------------------------------------------------------------------------------------------------------------------------------------|
| 1    | 0.19                 | 0.9453  | 1.76              | 0.08              | 0.99 | <a href="#">1mg2A</a> | <a href="#">GO:0055114</a> <a href="#">GO:0006810</a> <a href="#">GO:0022900</a> <a href="#">GO:0016491</a> <a href="#">GO:0042597</a> <a href="#">GO:0030058</a> <a href="#">GO:0005515</a> <a href="#">GO:0030416</a>                            |
| 2    | 0.19                 | 0.9408  | 1.63              | 0.07              | 0.98 | <a href="#">1maeH</a> | <a href="#">GO:0030416</a> <a href="#">GO:0042597</a> <a href="#">GO:0005515</a> <a href="#">GO:0055114</a> <a href="#">GO:0030058</a>                                                                                                             |
| 3    | 0.19                 | 0.9374  | 1.74              | 0.06              | 0.99 | <a href="#">3c75H</a> | <a href="#">GO:0055114</a> <a href="#">GO:0042597</a> <a href="#">GO:0030058</a> <a href="#">GO:0030416</a> <a href="#">GO:0005515</a>                                                                                                             |
| 4    | 0.19                 | 0.9286  | 1.69              | 0.05              | 0.97 | <a href="#">1mdaH</a> | <a href="#">GO:0005515</a> <a href="#">GO:0030058</a> <a href="#">GO:0030416</a> <a href="#">GO:0042597</a> <a href="#">GO:0055114</a>                                                                                                             |
| 5    | 0.16                 | 0.8159  | 2.60              | 0.06              | 0.92 | <a href="#">2h47F</a> | <a href="#">GO:0022900</a> <a href="#">GO:0006810</a> <a href="#">GO:0030058</a> <a href="#">GO:0030059</a> <a href="#">GO:0042597</a> <a href="#">GO:0005515</a> <a href="#">GO:0055114</a> <a href="#">GO:0030416</a> <a href="#">GO:0016491</a> |
| 6    | 0.14                 | 0.6612  | 3.23              | 0.09              | 0.78 | <a href="#">1jjuB</a> | <a href="#">GO:0005515</a>                                                                                                                                                                                                                         |
| 7    | 0.14                 | 0.6505  | 4.06              | 0.05              | 0.83 | <a href="#">1ri6A</a> | <a href="#">GO:0017057</a> <a href="#">GO:0005975</a> <a href="#">GO:0006006</a> <a href="#">GO:0016787</a> <a href="#">GO:0005515</a> <a href="#">GO:0006098</a>                                                                                  |
| 8    | 0.14                 | 0.6390  | 4.36              | 0.09              | 0.84 | <a href="#">1jofA</a> | <a href="#">GO:0016853</a> <a href="#">GO:0047768</a> <a href="#">GO:0005515</a>                                                                                                                                                                   |
| 9    | 0.14                 | 0.6455  | 4.01              | 0.07              | 0.82 | <a href="#">3hfqA</a> | <a href="#">GO:0005515</a>                                                                                                                                                                                                                         |
| 10   | 0.14                 | 0.6579  | 3.72              | 0.07              | 0.81 | <a href="#">1qniA</a> | <a href="#">GO:0046872</a> <a href="#">GO:0016020</a> <a href="#">GO:0005515</a> <a href="#">GO:0004129</a> <a href="#">GO:0005507</a>                                                                                                             |

## Consensus Prediction of Gene Ontology terms

| Molecular Function         |          | Biological Process         |          | Cellular Location          |          |
|----------------------------|----------|----------------------------|----------|----------------------------|----------|
| GO term                    | GO-Score | GO term                    | GO-Score | GO term                    | GO-Score |
| <a href="#">GO:0005515</a> | 0.64     | <a href="#">GO:0030416</a> | 0.64     | <a href="#">GO:0042597</a> | 0.64     |

[GO:0030058](#) 0.64      [GO:0006810](#) 0.33  
[GO:0022900](#) 0.33

- (a) Cscore<sup>GO</sup>, which is a combined measure for evaluating global and local similarity between query and template protein. Cscore<sup>GO</sup> values range in between [0-1]; where a higher value indicates a better confidence in predicting the function using the template.
- (b) TM-score is a measure of global structural similarity between query and template protein.
- (c) RMSD<sup>a</sup> is the RMSD between residues that are structurally aligned by TM-align.
- (d) IDEN<sup>a</sup> is the percentage sequence identity in the structurally aligned region.
- (e) Cov. represents the coverage of global structural alignment and is equal to the number of structurally aligned residues divided by length of the query protein.
- (f) The second table shows a consistence of function (GO terms) amongst top scoring templates. The GO-Score associated with each prediction is defined as the average weight of the GO term, where the weights are assigned based on Cscore<sup>GO</sup> of template from which the GO term is derived.

## Predicted Binding Site

### Template proteins with similar binding site:

| Click to view         | Rank | Cscore <sup>LB</sup> | PDB Hit               | TM-score | RMSD <sup>a</sup> | IDEN <sup>a</sup> | Cov.  | BS-score | Lig. Name | Download Complex         | Predicted binding site residues |
|-----------------------|------|----------------------|-----------------------|----------|-------------------|-------------------|-------|----------|-----------|--------------------------|---------------------------------|
| <input type="radio"/> | 1    | 0.01                 | <a href="#">1jofH</a> | 0.649    | 4.32              | 0.079             | 0.846 | 0.22     | PIN       | <a href="#">Download</a> | 285,286,312,314,323             |
| <input type="radio"/> | 2    | 0.01                 | <a href="#">1gq10</a> | 0.633    | 4.19              | 0.065             | 0.810 | 0.26     | PEPTIDE   | <a href="#">Download</a> | 191,193,194,195,196,197,242,243 |

**Click on the radio buttons to visualize predicted binding site and residues.**

- (a) Cscore<sup>LB</sup> is the confidence score of predicted binding site. Cscore<sup>LB</sup> values range in between [0-1]; where a higher score indicates a more reliable ligand-binding site prediction.
- (b) BS-score is a measure of local similarity (sequence & structure) between template binding site and predicted binding site in the query structure. Based on large scale benchmarking analysis, we have observed that a BS-score >1 reflects a significant local match between the predicted and template binding site.
- (c) TM-score is a measure of global structural similarity between query and template protein.
- (d) RMSD<sup>a</sup> the RMSD between residues that are structurally aligned by TM-align.
- (e) IDEN<sup>a</sup> is the percentage sequence identity in the structurally aligned region.
- (f) Cov. represents the coverage of global structural alignment and is equal to the number of structurally aligned residues divided by length of the query protein.

Spin On/Off

**[Click on [S205397\\_results.tar.bz2](#) to download the tarball file including all modeling results listed on this page]**

Please cite following articles when you use the I-TASSER server:

1. Yang Zhang. I-TASSER server for protein 3D structure prediction. BMC Bioinformatics, 9:40 (2008).
2. Ambrish Roy, Alper Kucukural, Yang Zhang. I-TASSER: a unified platform for automated protein structure and function prediction. Nature Protocols, vol 5, 725-738 (2010).

3. Amrishi Roy, Jianyi Yang, Yang Zhang. COFACTOR: an accurate comparative algorithm for structure-based protein function annotation. *Nucleic Acids Research*, vol 40, W471-W4 77 (2012).



[\[Home\]](#) [\[Server\]](#) [\[Queue\]](#) [\[About\]](#) [\[Remove\]](#) [\[Statistics\]](#)

## I-TASSER results for job id S206754

[Click on [S206754\\_results.tar.bz2](#) to download the tarball file including all modeling results listed on this page]

### Submitted sequence in [FASTA format](#)

#### > S1Sdr4L Protein

```
MMQTLNYPYPSTSKTAEIMARYRPIAPKPEAPTSPVSEDNPTGLPPNIQKSPFLRNVWPQLQARPTRTRKRGRGTALGPPSMKRARGNYFPAGQFPNYHQVVAASPSYRPNVVPQFTLIPNLLPLKCGLGTSVTTPSNSITLPLMACTTTTLPMLVEKHSGEEIRGI
DLNLAADGPEELDFMPQLQGPKTPGPVVITPQVVRPVGSSISIGCINEEEAPDGGATNKKFIKKPEEVVEVEAEALPAVSDSNNKVRLTNAAYKEMVQPECCWLDYVGNACKRIGGEVILEFLDSSCSVPMSSDGFNCWVKIEWGAAQGKKNVKAFCNAV
KLACQSKDYVFEWRFHHTDDNTPESAASNI
```

### Predicted secondary structure

|                    |                                                                                                                                                              |            |            |            |            |            |     |
|--------------------|--------------------------------------------------------------------------------------------------------------------------------------------------------------|------------|------------|------------|------------|------------|-----|
|                    | 20                                                                                                                                                           | 40         | 60         | 80         | 100        | 120        | 140 |
|                    |                                                                                                                                                              |            |            |            |            |            |     |
| <b>Sequence</b>    | MMQTLNYPYPSTSKTAEIMARYRPIAPKPEAPTSPVSEDNPTGLPPNIQKSPFLRNVWPQLQARPTRTRKRGRGTALGPPSMKRARGNYFPAGQFPNYHQVVAASPSYRPNVVPQFTLIPNLLPLKCGLGTSVTTPSNSITLPLMACTTTTLPMLV |            |            |            |            |            |     |
| <b>Prediction</b>  | CCCCCCCCCC                                                                                                                                                   | HHHHHHHHHH | CCCCCCCCCC | CCCCCCCCCC | CCCCCCCCCC | CCCCCCCCCC | SSS |
| <b>Conf. Score</b> | 95323688733789999973478898999988877778776642210125233201301135665444467787676433456656456788886554445675545566666666666666534454556554456112026878866676434  |            |            |            |            |            |     |

H:Helix; S:Strand; C:Coil

### Predicted solvent accessibility

|                   |                                                                                                                                                              |    |    |    |     |     |     |
|-------------------|--------------------------------------------------------------------------------------------------------------------------------------------------------------|----|----|----|-----|-----|-----|
|                   | 20                                                                                                                                                           | 40 | 60 | 80 | 100 | 120 | 140 |
|                   |                                                                                                                                                              |    |    |    |     |     |     |
| <b>Sequence</b>   | MMQTLNYPYPSTSKTAEIMARYRPIAPKPEAPTSPVSEDNPTGLPPNIQKSPFLRNVWPQLQARPTRTRKRGRGTALGPPSMKRARGNYFPAGQFPNYHQVVAASPSYRPNVVPQFTLIPNLLPLKCGLGTSVTTPSNSITLPLMACTTTTLPMLV |    |    |    |     |     |     |
| <b>Prediction</b> | 623213425331203200331200012143444444444444344434433333214324433443444344433464343444443542524544644454554445344443333423436343644443343012021132436515435    |    |    |    |     |     |     |

Values range from 0 (buried residue) to 9 (highly exposed residue)

### Predicted normalized B-factor

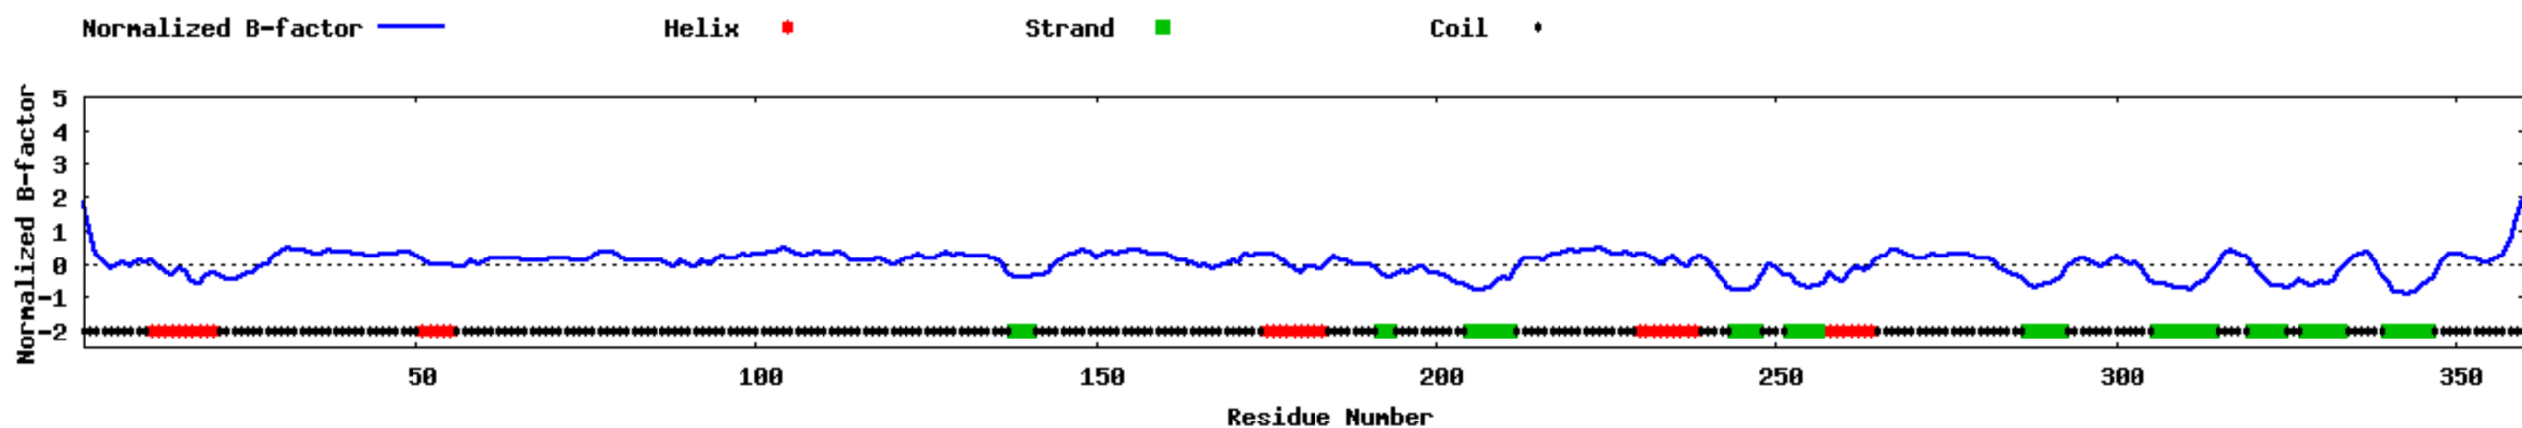

[Read more about predicted normalized B-factor](#)

### Top 10 templates used by I-TASSER

| Rank | PDB Hit               | Iden1 | Iden2 | Cov  | Norm. Z-score | Download Align.          |                                                                                                                                      |
|------|-----------------------|-------|-------|------|---------------|--------------------------|--------------------------------------------------------------------------------------------------------------------------------------|
|      |                       |       |       |      |               |                          | 20 40 60 80 100 120                                                                                                                  |
|      |                       |       |       |      |               |                          | Sec.Str                                                                                                                              |
|      |                       |       |       |      |               |                          | Seq                                                                                                                                  |
| 1    | <a href="#">3j65R</a> | 0.06  | 0.17  | 0.87 | 1.87          | <a href="#">Download</a> | -----SSTQDSKAQTLNSNPEILLRKRNRADRTRIERQELAKKKREEQIKKRSNKNKFVRAESIVAKTLATSREKERIKRVSILEDKKAKNETQHIASGKDF                               |
| 2    | <a href="#">1maeH</a> | 0.07  | 0.19  | 0.92 | 1.78          | <a href="#">Download</a> | -----SSASAAAAAALAGAADGPTNDEAPGADGRRSYINLPAHHSAI IQQWVLDAGSGSILGHVNGGFLPNPVAAHSGSEFALASTSFSRIAKGKRTDYDPVTFPLPIADIELPDAPRFDVGPYSWM     |
| 3    | <a href="#">4bmlA</a> | 0.05  | 0.16  | 0.84 | 1.84          | <a href="#">Download</a> | -TALKLFSGEVFTAFNNASIFKGLVRSYDLRGGKSKQFMFTGKLSAGYHTPGTPIVGDAGIKANEKTLVMDDLLVSSQFVYSLDEIFSQYSTRAEVSKQIGEALATHYDERIARV LAKASAEASPVGTGEF |
| 4    | <a href="#">1w0rA</a> | 0.08  | 0.18  | 0.94 | 1.71          | <a href="#">Download</a> | VSVEDCCLNTAFAYQKRSGGLCQPCRSRWSLSVSGWNGQCSGKVAPGTLEWQLQACEDQQCCPEMGGWSGWGPWEPCSVTACNHPAPKCGGHCPCGQAQEQESEACDTQQVCPHTGAWATWGPWTPCSASCH |
| 5    | <a href="#">2ocwA</a> | 0.08  | 0.18  | 0.98 | 1.80          | <a href="#">Download</a> | ---LGINSRGLSFDVSLEVSQGPGLLNDTKVYTVDLGRTVTINC PFKTENAQRKSLSYKQIGLYPVLVIDSSGYVNPNYTGRIRLDIQGTGLDSDSNKNKNADLQVLKPEPELVYEDLRGSVTFHCALC   |
| 6    | <a href="#">4btgA</a> | 0.10  | 0.17  | 0.93 | 1.53          | <a href="#">Download</a> | GFNL-----KVKDLNGSARGLTQLPLQFTRTFSASMTSELLWEAYVYRVGRATATY PFDANSPTPKELDPSARLRNTNGIRGRAEVIFSDEELSSTIIPWFIEAMSEVSPFKLRPINETTSYIGQTS     |
| 7    | <a href="#">3cm9S</a> | 0.10  | 0.18  | 0.98 | 1.69          | <a href="#">Download</a> | ---LGINSRGLSFDVSLEVSQGPGLLNDTKVYTVDLGRTVTINC PFKTENAQRKSLSYKQIGLYPVLVIDSSGYVNPNYTGRIRLDIQGTGDDSNSNKNKNADLQVLKPEPELVYEDLRGSVTFHCALGPE |
| 8    | <a href="#">4mguA</a> | 0.06  | 0.21  | 0.94 | 1.48          | <a href="#">Download</a> | IIPITRTRVNDVTVYVDFVITSLGRLPNPNEFAQLPPGSCIEECNVRVTAFTPRIAFQATLNQNQFILHATGLNIKTQGVDRPKQANEPMVVSSIDELGADENLFEDYVKEKSVPNHVRHQFGIPYF      |
| 9    | <a href="#">1kvpA</a> | 0.09  | 0.22  | 0.94 | 1.63          | <a href="#">Download</a> | --TEANPNELNQQDDARYGFRCCPLPETELSRQMTTSTGMAPVTTKFRDVPNL SGTPLIFRDNKGRITIKTGQLGIGPVDAGFLVAQNTAQAANGERAIPSNLWADLSNATSIDIMGLQAAYANLHTDQER |
| 10   | <a href="#">4jrfA</a> | 0.07  | 0.19  | 1.00 | 1.44          | <a href="#">Download</a> | YSVSVAPKSGELATTDYILNVGANKAGYDGKAFKVPSPDKFKTACVASASWSAINGAVEQTLDEVGTGTSKNNFINAGDNANPTNGALVTANVKVVDGTTIPDVATAISEAQADRSIYTNPDGLKVPAG    |

- (a) All the residues are colored in black; however, those residues in template which are identical to the residue in the query sequence are highlighted in color. Coloring scheme is based on the property of amino acids, where polar are brightly coloured while non-polar residues are colored in dark shade. [more about the colors used](#)
- (b) Rank of templates represents the top ten threading templates used by I-TASSER.
- (c) Ident1 is the percentage sequence identity of the templates in the threading aligned region with the query sequence.
- (d) Ident2 is the percentage sequence identity of the whole template chains with query sequence.
- (e) Cov represents the coverage of the threading alignment and is equal to the number of aligned residues divided by the length of query protein.
- (f) Norm. Z-score is the normalized Z-score of the threading alignments. Alignment with a Normalized Z-score >1 mean a good alignment and vice versa.
- (g) Download Align. provides the 3D structure of the aligned regions of the threading templates.
- (h) The top 10 alignments reported above (in order of their ranking) are from the following threading programs:  
 1: Neff-PPAS 2: PROSPECT2 3: Neff-PPAS 4: PROSPECT2 5: Neff-PPAS 6: PROSPECT2 7: Neff-PPAS 8: PROSPECT2 9: Neff-PPAS 10: PROSPECT2

## Top 5 Models predicted by I-TASSER

### Generated 3D models

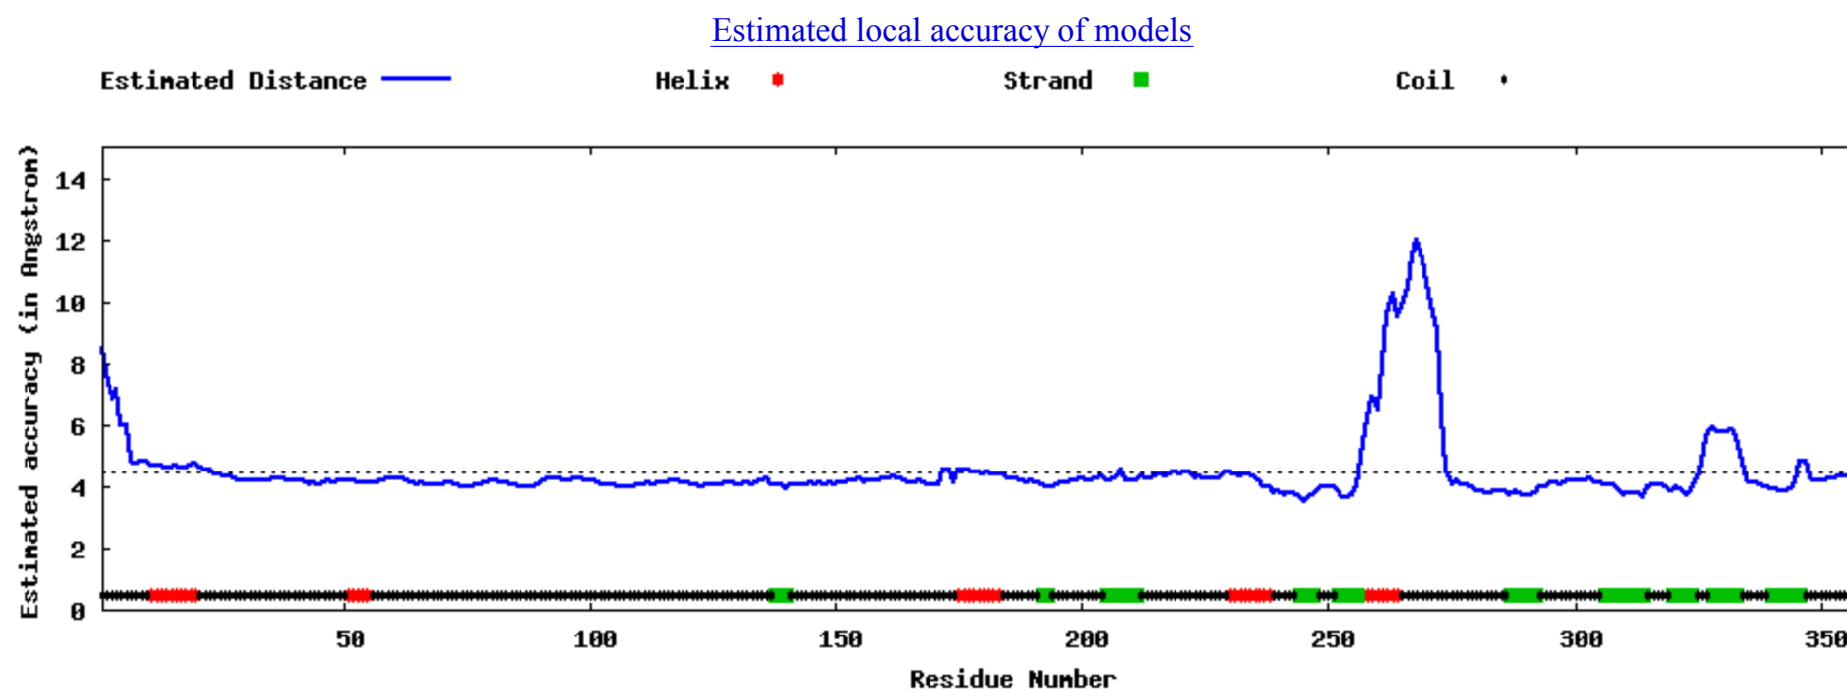

- [Download Model 1](#)
- C-score=-1.62 ([Read more about C-score](#))
- Estimated TM-score = 0.52±0.15

- Estimated RMSD =  $10.3 \pm 4.6 \text{ \AA}$

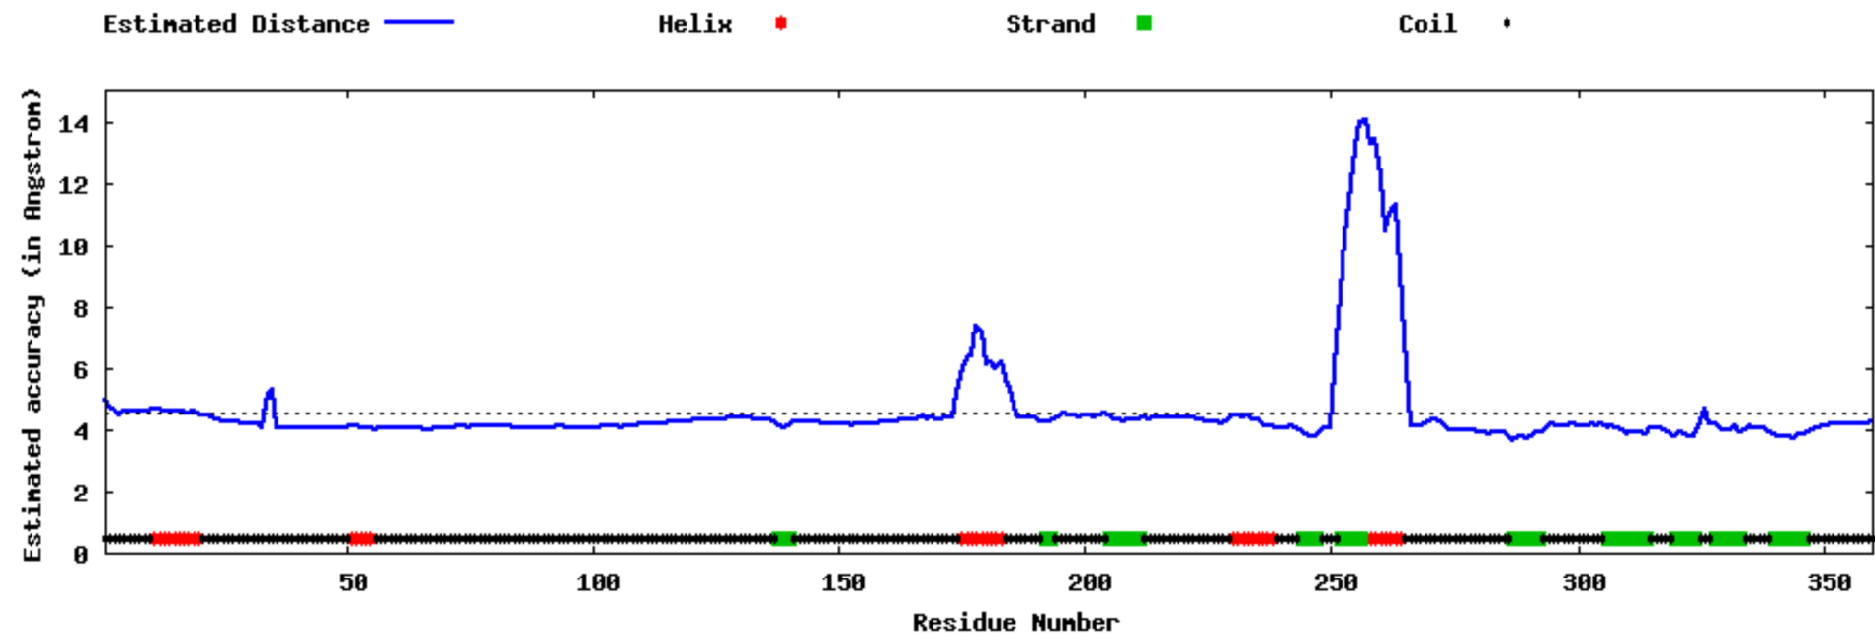

- [Download Model 2](#)
- C-score = -1.92

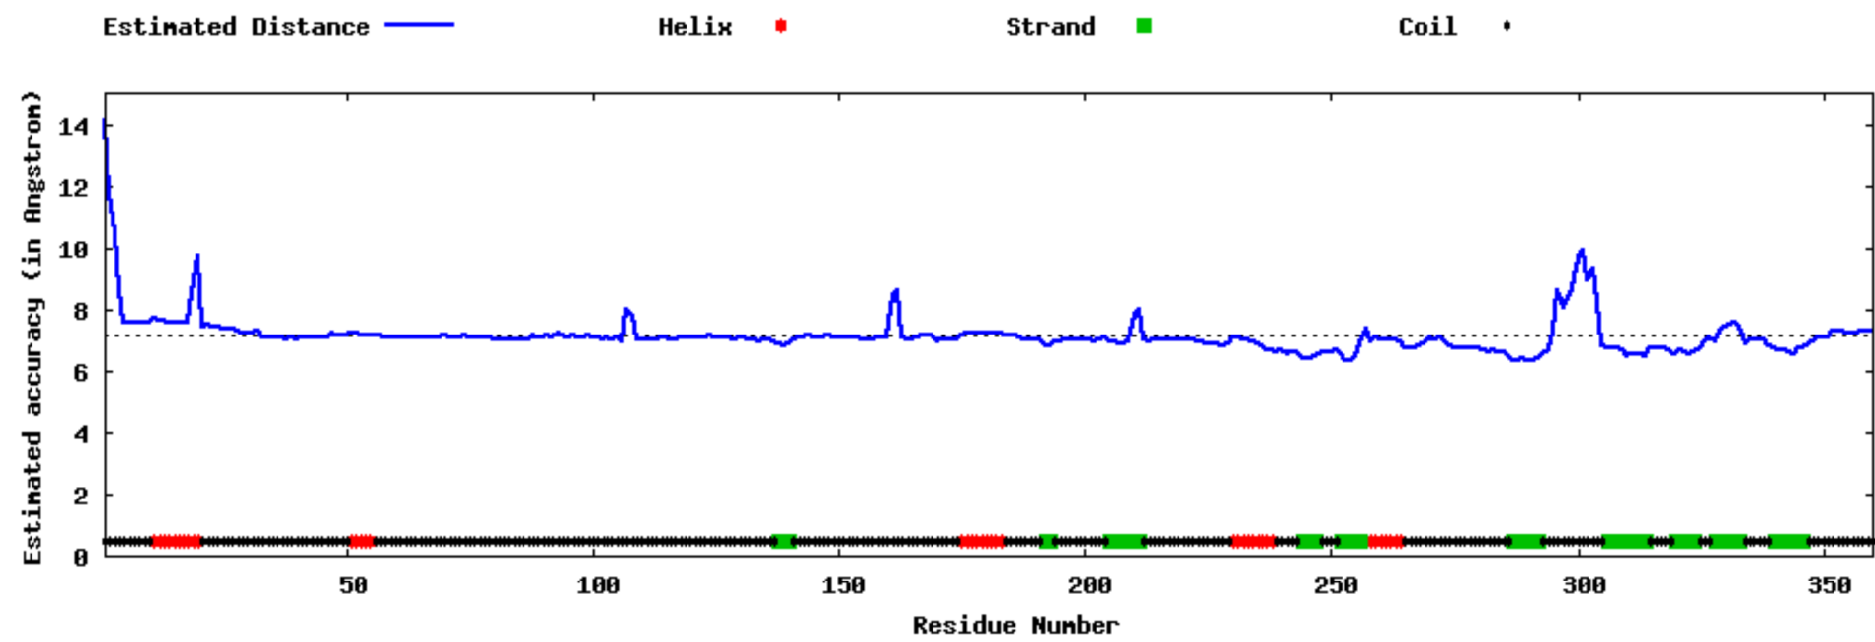

- [Download Model 3](#)
- C-score = -1.57

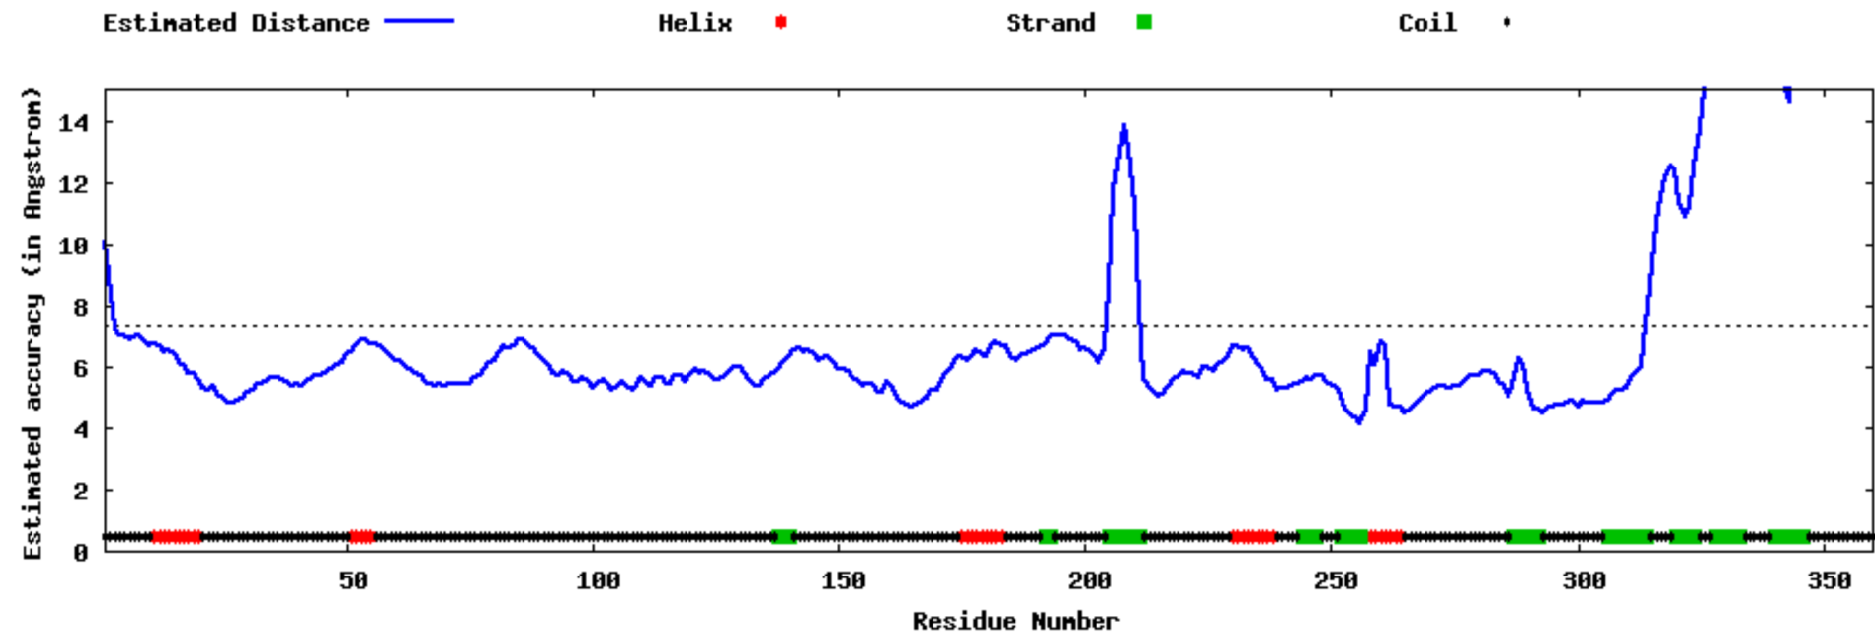

- [Download Model 4](#)
- C-score = -3.35

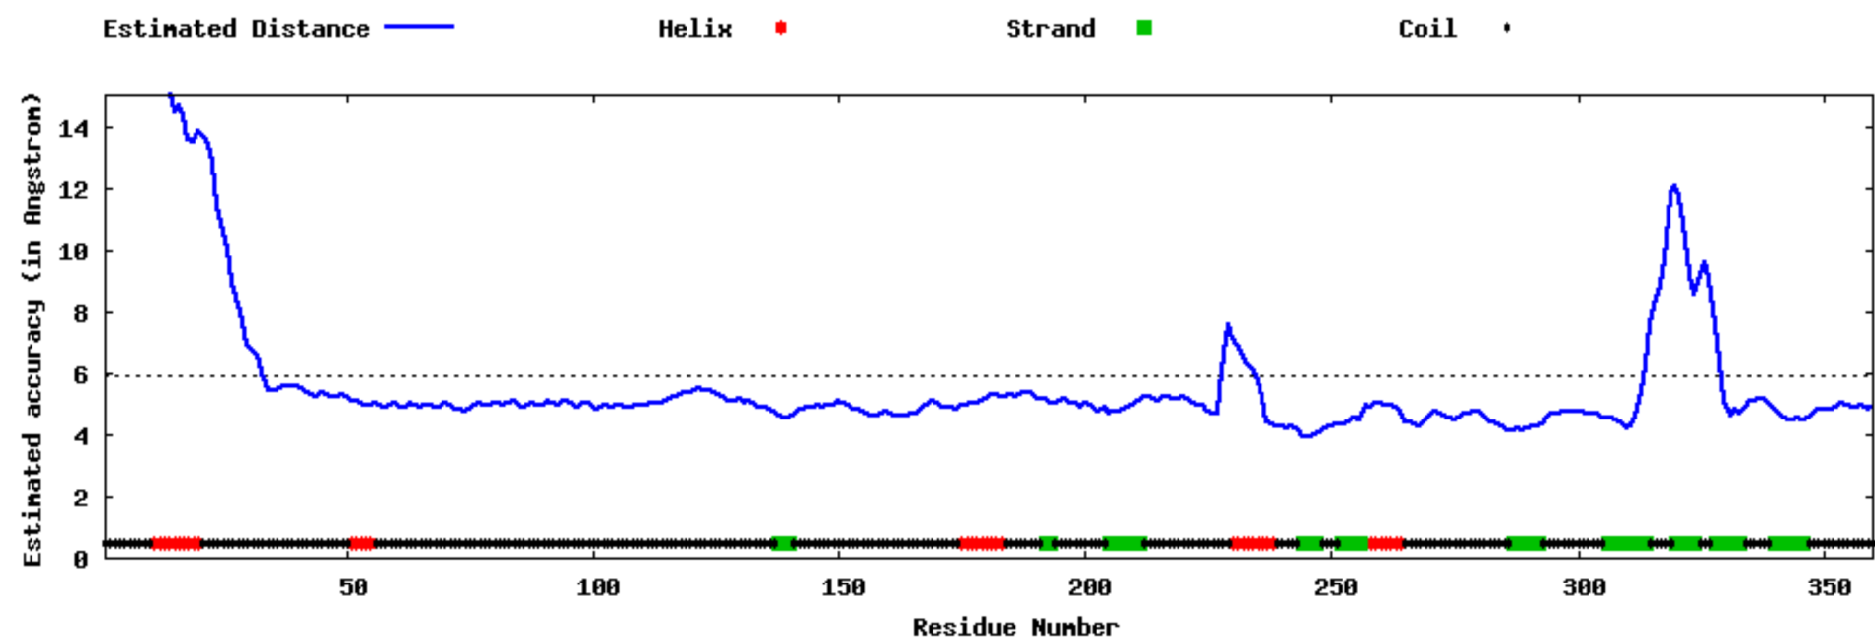

- [Download Model 5](#)
- C-score = -2.81

Proteins structurally close to the target in the PDB (as identified by [TM-align](#))

**Top 10 Identified structural analogs in PDB**

| Click to view         | Rank | PDB Hit                | TM-score | RMSD <sup>a</sup> | IDEN <sup>a</sup> | Cov   | Alignment                |
|-----------------------|------|------------------------|----------|-------------------|-------------------|-------|--------------------------|
| <input type="radio"/> | 1    | <a href="#">1mg2E</a>  | 0.899    | 1.43              | 0.066             | 0.928 | <a href="#">Download</a> |
| <input type="radio"/> | 2    | <a href="#">1maeH</a>  | 0.897    | 1.20              | 0.070             | 0.917 | <a href="#">Download</a> |
| <input type="radio"/> | 3    | <a href="#">3c75J</a>  | 0.895    | 1.34              | 0.054             | 0.919 | <a href="#">Download</a> |
| <input type="radio"/> | 4    | <a href="#">1mdaH</a>  | 0.884    | 1.30              | 0.049             | 0.908 | <a href="#">Download</a> |
| <input type="radio"/> | 5    | <a href="#">1madH</a>  | 0.884    | 1.30              | 0.049             | 0.908 | <a href="#">Download</a> |
| <input type="radio"/> | 6    | <a href="#">2h47H</a>  | 0.764    | 2.56              | 0.045             | 0.850 | <a href="#">Download</a> |
| <input type="radio"/> | 7    | <a href="#">2vz1A</a>  | 0.643    | 4.32              | 0.072             | 0.822 | <a href="#">Download</a> |
| <input type="radio"/> | 8    | <a href="#">1t2xA2</a> | 0.630    | 4.12              | 0.069             | 0.794 | <a href="#">Download</a> |
| <input type="radio"/> | 9    | <a href="#">1qniF</a>  | 0.616    | 3.88              | 0.065             | 0.758 | <a href="#">Download</a> |
| <input type="radio"/> | 10   | <a href="#">3sbqA</a>  | 0.615    | 4.00              | 0.068             | 0.764 | <a href="#">Download</a> |

- (a) Query structure is shown in cartoon, while the structural analog is displayed using backbone trace.
- (b) Ranking of proteins is based on TM-score of the structural alignment between the query structure and known structures in the PDB library.
- (c) RMSD<sup>a</sup> is the RMSD between residues that are structurally aligned by TM-align.
- (d) IDEN<sup>a</sup> is the percentage sequence identity in the structurally aligned region.
- (e) Cov represents the coverage of the alignment by TM-align and is equal to the number of structurally aligned residues divided by length of the query protein.

Spin On/Off

Predicted function using [COACH](#)

Ligand binding sites

| Click to view                    | Rank | C-score | Cluster size | PDB Hit                       | Lig Name | Download Complex                           | Ligand Binding Site Residues |
|----------------------------------|------|---------|--------------|-------------------------------|----------|--------------------------------------------|------------------------------|
| <input checked="" type="radio"/> | 1    | 0.05    | 3            | <a href="#">1ux1A</a> THU     |          | N/A                                        | 258,259,260                  |
| <input type="radio"/>            | 2    | 0.03    | 2            | <a href="#">2dg1A</a> CA      |          | <a href="#">Rep</a> , <a href="#">Mult</a> | 127,243,311,352,353          |
| <input type="radio"/>            | 3    | 0.03    | 2            | <a href="#">2z2pA</a> DOL     |          | <a href="#">Rep</a> , <a href="#">Mult</a> | 46,308,310,335               |
| <input type="radio"/>            | 4    | 0.03    | 2            | <a href="#">4c1yC</a> MFB     |          | <a href="#">Rep</a> , <a href="#">Mult</a> | 39,58,62,317,322,342         |
| <input type="radio"/>            | 5    | 0.03    | 2            | <a href="#">1eakC</a> PEPTIDE |          | N/A                                        | 200,203,205                  |

[Download](#) the residue-specific ligand binding probability, which is estimated by SVM.

[Download](#) the all possible binding ligands and detailed prediction summary.

[Download](#) the templates clustering results.

- (a) **C-score** is the confidence score of the prediction. C-score ranges [0-1], where a higher score indicates a more reliable prediction.
- (b) **Cluster size** is the total number of templates in a cluster.
- (c) **Lig Name** is name of possible binding ligand. Click the name to view its information in [the BioLiP database](#).
- (d) **Rep** is a single complex structure with the most representative ligand in the cluster, i.e., the one listed in the **Lig Name** column. **Mult** is the complex structures with all potential binding ligands in the cluster.

Spin On/Off

## Enzyme Commission (EC) numbers and active sites

| Click to view         | Rank | Cscore <sup>EC</sup> | PDB Hit               | TM-score | RMSD <sup>a</sup> | IDEN <sup>a</sup> | Cov   | EC Number                | Active Site Residues |
|-----------------------|------|----------------------|-----------------------|----------|-------------------|-------------------|-------|--------------------------|----------------------|
| <input type="radio"/> | 1    | 0.258                | <a href="#">2madH</a> | 0.896    | 1.21              | 0.070             | 0.917 | <a href="#">1.4.99.3</a> | 271                  |
| <input type="radio"/> | 2    | 0.257                | <a href="#">2gc7A</a> | 0.898    | 1.45              | 0.066             | 0.928 | <a href="#">1.4.99.3</a> | 245,248              |
| <input type="radio"/> | 3    | 0.254                | <a href="#">3c75J</a> | 0.895    | 1.34              | 0.054             | 0.919 | <a href="#">1.4.99.3</a> | 264,267,299          |
| <input type="radio"/> | 4    | 0.248                | <a href="#">1madH</a> | 0.884    | 1.30              | 0.049             | 0.908 | <a href="#">1.4.99.3</a> | 241                  |
| <input type="radio"/> | 5    | 0.216                | <a href="#">2h47H</a> | 0.764    | 2.56              | 0.045             | 0.850 | <a href="#">1.4.99.4</a> | 254,261              |

**Click on the radio buttons to visualize predicted active site residues.**

- (a) Cscore<sup>EC</sup> is the confidence score for the EC number prediction. Cscore<sup>EC</sup> values range in between [0-1]; where a higher score indicates a more reliable EC number prediction.
- (b) TM-score is a measure of global structural similarity between query and template protein.
- (c) RMSD<sup>a</sup> is the RMSD between residues that are structurally aligned by TM-align.
- (d) IDEN<sup>a</sup> is the percentage sequence identity in the structurally aligned region.
- (e) Cov represents the coverage of global structural alignment and is equal to the number of structurally aligned residues divided by length of the query protein.

Spin On/Off

## Gene Ontology (GO) terms

## Top 10 homologous GO templates in PDB

| Rank | Cscore <sup>GO</sup> | TM-score | RMSD <sup>a</sup> | IDEN <sup>a</sup> | Cov  | PDB Hit               | Associated GO Terms                                                                                                                                                                                                                                                                                                                                               |
|------|----------------------|----------|-------------------|-------------------|------|-----------------------|-------------------------------------------------------------------------------------------------------------------------------------------------------------------------------------------------------------------------------------------------------------------------------------------------------------------------------------------------------------------|
| 1    | 0.26                 | 0.8977   | 1.18              | 0.07              | 0.92 | <a href="#">1maeH</a> | <a href="#">GO:0030416</a> <a href="#">GO:0042597</a> <a href="#">GO:0005515</a> <a href="#">GO:0055114</a> <a href="#">GO:0030058</a>                                                                                                                                                                                                                            |
| 2    | 0.26                 | 0.8981   | 1.45              | 0.07              | 0.93 | <a href="#">1mg2A</a> | <a href="#">GO:0055114</a> <a href="#">GO:0006810</a> <a href="#">GO:0022900</a> <a href="#">GO:0016491</a> <a href="#">GO:0042597</a> <a href="#">GO:0030058</a> <a href="#">GO:0005515</a> <a href="#">GO:0030416</a>                                                                                                                                           |
| 3    | 0.25                 | 0.8953   | 1.34              | 0.05              | 0.92 | <a href="#">3c75H</a> | <a href="#">GO:0055114</a> <a href="#">GO:0042597</a> <a href="#">GO:0030058</a> <a href="#">GO:0030416</a> <a href="#">GO:0005515</a>                                                                                                                                                                                                                            |
| 4    | 0.25                 | 0.8844   | 1.30              | 0.05              | 0.91 | <a href="#">1mdaH</a> | <a href="#">GO:0005515</a> <a href="#">GO:0030058</a> <a href="#">GO:0030416</a> <a href="#">GO:0042597</a> <a href="#">GO:0055114</a>                                                                                                                                                                                                                            |
| 5    | 0.22                 | 0.7651   | 2.46              | 0.05              | 0.85 | <a href="#">2h47F</a> | <a href="#">GO:0022900</a> <a href="#">GO:0006810</a> <a href="#">GO:0030058</a> <a href="#">GO:0030059</a> <a href="#">GO:0042597</a> <a href="#">GO:0005515</a> <a href="#">GO:0055114</a> <a href="#">GO:0030416</a> <a href="#">GO:0016491</a>                                                                                                                |
| 6    | 0.17                 | 0.6408   | 4.42              | 0.07              | 0.83 | <a href="#">1k3iA</a> | <a href="#">GO:0055114</a> <a href="#">GO:0046872</a> <a href="#">GO:0045480</a> <a href="#">GO:0016491</a> <a href="#">GO:0005576</a> <a href="#">GO:0005515</a> <a href="#">GO:0007155</a>                                                                                                                                                                      |
| 7    | 0.17                 | 0.6161   | 3.88              | 0.07              | 0.76 | <a href="#">1qniA</a> | <a href="#">GO:0046872</a> <a href="#">GO:0016020</a> <a href="#">GO:0005515</a> <a href="#">GO:0004129</a> <a href="#">GO:0005507</a>                                                                                                                                                                                                                            |
| 8    | 0.10                 | 0.3231   | 7.06              | 0.03              | 0.56 | <a href="#">2ocwA</a> | <a href="#">GO:0005515</a>                                                                                                                                                                                                                                                                                                                                        |
| 9    | 0.07                 | 0.2208   | 7.48              | 0.02              | 0.40 | <a href="#">1kvpA</a> | <a href="#">GO:0019012</a> <a href="#">GO:0030430</a> <a href="#">GO:0019028</a> <a href="#">GO:0005198</a>                                                                                                                                                                                                                                                       |
| 10   | 0.06                 | 0.1413   | 6.73              | 0.05              | 0.24 | <a href="#">1oqyA</a> | <a href="#">GO:0006289</a> <a href="#">GO:0031593</a> <a href="#">GO:0006281</a> <a href="#">GO:0006974</a> <a href="#">GO:0005515</a> <a href="#">GO:0045070</a> <a href="#">GO:0032434</a> <a href="#">GO:0003697</a> <a href="#">GO:0044419</a> <a href="#">GO:0005634</a><br><a href="#">GO:0000502</a> <a href="#">GO:0003684</a> <a href="#">GO:0043161</a> |

## Consensus prediction of GO terms

|                           |                            |                            |                            |
|---------------------------|----------------------------|----------------------------|----------------------------|
| <b>Molecular Function</b> | <a href="#">GO:0030058</a> | <a href="#">GO:0005515</a> |                            |
| <b>GO-Score</b>           | 0.76                       | 0.76                       |                            |
| <b>Biological Process</b> | <a href="#">GO:0030416</a> | <a href="#">GO:0006810</a> | <a href="#">GO:0022900</a> |
| <b>GO-Score</b>           | 0.76                       | 0.42                       | 0.42                       |
| <b>Cellular Component</b> | <a href="#">GO:0042597</a> |                            |                            |
| <b>GO-Score</b>           | 0.76                       |                            |                            |

(a) Cscore<sup>GO</sup> is a combined measure for evaluating global and local similarity between query and template protein. It's range is [0-1] and higher values indicate more confident predictions.

(b) TM-score is a measure of global structural similarity between query and template protein.

(c) RMSD<sup>a</sup> is the RMSD between residues that are structurally aligned by TM-align.

(d) IDEN<sup>a</sup> is the percentage sequence identity in the structurally aligned region.

(e) Cov represents the coverage of global structural alignment and is equal to the number of structurally aligned residues divided by length of the query protein.

(f) The second table shows a consensus GO terms amongst the top scoring templates. The GO-Score associated with each prediction is defined as the average weight of the GO term, where the weights are assigned based on Cscore<sup>GO</sup> of the template.

[Click on [S206754\\_results.tar.bz2](#) to download the tarball file including all modeling results listed on this page]

Please cite the following articles when you use the I-TASSER server:

1. Y Zhang. I-TASSER server for protein 3D structure prediction. BMC Bioinformatics, 9:40, 2008.
2. A Roy, A Kucukural, Y Zhang. I-TASSER: a unified platform for automated protein structure and function prediction. Nature Protocols, 5:725, 2010.
3. J Yang, A Roy, Y Zhang. Protein-ligand binding site recognition using complementary binding-specific substructure comparison and sequence profile alignment, Bioinformatics, 29:2588, 2013.
